# Supplementary material for: A Transfer Learning-Based Diagnostic Model for Biliary Atresia: A Multicenter Study with 389 Cases
Source: Research Square preprint supplement (doi:10.21203/rs.3.rs-8053210/v1), 2025-11-21
Supplement: Supplementary file 1 [file b71b49c12784b13de40c2508.docx]

**Table 1. Clinical and Ultrasonic Data of the 179 BA and 106 non-BA Cohorts in Derivation cohort**

| Variables | Total (n = 389) | Non-BA (n = 166) | BA (n = 223) | Statistic | *P* |
| --- | --- | --- | --- | --- | --- |
|
| Age, M (Q₁, Q₃) | 42.00 (32.00, 54.00) | 42.00 (30.90, 53.00) | 44.00 (32.10, 56.00) | Z=-0.85 | 0.393 |
| Weight, M (Q₁, Q₃) | 4100.00 (3500.00, 4800.00) | 4000.00 (3177.50, 4800.00) | 4200.00 (3710.00, 4750.00) | Z=-1.74 | 0.081 |
| Gender, n(%) |  |  |  | χ²=13.78 | **<.001** |
| Female | 171 (43.96) | 55 (33.13) | 116 (52.02) |  |  |
| Male | 218 (56.04) | 111 (66.87) | 107 (47.98) |  |  |
| Acholic stools, n(%) |  |  |  | χ²=94.58 | **<.001** |
| No | 192 (49.48) | 129 (78.18) | 63 (28.25) |  |  |
| Yes | 196 (50.52) | 36 (21.82) | 160 (71.75) |  |  |
| Abnormal GB morphology, n(%) |  |  |  | χ²=130.58 | **<.001** |
| No | 128 (32.90) | 107 (64.46) | 21 (9.42) |  |  |
| Yes | 261 (67.10) | 59 (35.54) | 202 (90.58) |  |  |
| Micro-GB, n(%) |  |  |  | χ²=72.01 | **<.001** |
| No | 137 (37.03) | 93 (63.27) | 44 (19.73) |  |  |
| Yes | 233 (62.97) | 54 (36.73) | 179 (80.27) |  |  |
| Abnormal GEI, n(%) |  |  |  | χ²=200.26 | **<.001** |
| No | 155 (40.05) | 134 (80.72) | 21 (9.50) |  |  |
| Yes | 232 (59.95) | 32 (19.28) | 200 (90.50) |  |  |
| GB length, Mean ± SD | 1.78 ± 1.04 | 2.41 ± 0.93 | 1.37 ± 0.89 | t=10.87 | **<.001** |
| GB width, Mean ± SD | 0.42 ± 0.25 | 0.56 ± 0.25 | 0.33 ± 0.21 | t=9.51 | **<.001** |
| GB CSA, Mean ± SD | 0.94 ± 0.96 | 1.50 ± 1.12 | 0.58 ± 0.62 | t=9.03 | **<.001** |
| L/W preprandial GB, Mean ± SD | 4.70 ± 2.77 | 4.97 ± 3.48 | 4.51 ± 2.12 | t=1.52 | 0.129 |
| TPN, Mean ± SD | 46.89 ± 9.80 | 45.55 ± 10.40 | 47.87 ± 9.24 | t=-2.27 | **0.024** |
| ALP, Mean ± SD | 538.22 ± 220.90 | 521.22 ± 217.52 | 550.94 ± 223.03 | t=-1.31 | 0.190 |
| AST, Mean ± SD | 207.07 ± 215.58 | 200.87 ± 235.86 | 211.71 ± 199.50 | t=-0.49 | 0.625 |
| ALT, Mean ± SD | 134.49 ± 154.41 | 138.79 ± 184.28 | 131.28 ± 127.96 | t=0.47 | 0.636 |
| GGT, Mean ± SD | 378.31 ± 344.98 | 195.62 ± 214.29 | 514.92 ± 360.98 | t=-10.87 | **<.001** |
| TBIL, Mean ± SD | 162.97 ± 71.04 | 150.72 ± 84.28 | 172.12 ± 57.78 | t=-2.81 | **0.005** |
| DBIL, Mean ± SD | 100.98 ± 55.71 | 93.94 ± 67.92 | 106.24 ± 43.88 | t=-2.04 | **0.043** |
| IBIL, Mean ± SD | 62.89 ± 54.54 | 57.55 ± 49.64 | 66.88 ± 57.71 | t=-1.67 | 0.095 |
| TBA, Mean ± SD | 111.79 ± 60.94 | 99.23 ± 62.11 | 120.99 ± 58.54 | t=-3.37 | **<.001** |
| WBC, Mean ± SD | 9.38 ± 4.00 | 10.37 ± 3.45 | 8.64 ± 4.22 | t=4.44 | **<.001** |
| PLT, Mean ± SD | 382.75 ± 154.45 | 356.61 ± 154.77 | 402.26 ± 151.64 | t=-2.90 | **0.004** |
| APRI, Mean ± SD | 1.03 ± 1.68 | 1.22 ± 2.15 | 0.89 ± 1.21 | t=1.76 | 0.080 |
| **Abbreviation:** BA: biliary atresia, B: gallbladder, LSM: liver stiffness measurement, TPN: total protein, ALP: alkaline phosphatase, AST: aspartate aminotransferase, ALT: alanine transaminase, GGT: gamma-glutamyl transpeptidase, TBIL: total bilirubin, DBIL: direct bilirubin, IBIL: indirect bilirubin, TBA: total bile acid, WBC: white blood cells, PLT: platelet, APRI: aspartate aminotransferase-to-platelet ratio index, CSA: cross-sectional area CSA, GEI: gallbladder emptying index, GBLW: GB length to width ratio. t: t-test, Z: Mann-Whitney test, χ²: Chi-square test, SD: standard deviation, M: Median, Q₁: 1st Quartile, Q₃: 3st Quartile | | | | | | |  |

### **Table2．Univariate and Multivariate Analysis of BA Diagnostic Characteristics in Derivation cohort**

| **Variables** | **Univariate analysis** | | | | |  | **Multivariate analysis** | | | | |
| --- | --- | --- | --- | --- | --- | --- | --- | --- | --- | --- | --- |
| **β** | **S.E** | **Z** | ***P*** | **OR (95%CI)** | **β** | **S.E** | **Z** | ***P*** | **OR (95%CI)** |
| Gender |  |  |  |  |  |  |  |  |  |  |  |
| Female |  |  |  |  | 1.00 (Reference) |  |  |  |  |  | 1.00 (Reference) |
| Male | -0.78 | 0.21 | -3.68 | **<.001** | 0.46 (0.30 ~ 0.69) |  | -0.76 | 0.49 | -1.54 | 0.124 | 0.47 (0.18 ~ 1.23) |
| Acholic stools |  |  |  |  |  |  |  |  |  |  |  |
| No |  |  |  |  | 1.00 (Reference) |  |  |  |  |  | 1.00 (Reference) |
| Yes | 2.21 | 0.24 | 9.20 | **<.001** | 9.10 (5.68 ~ 14.57) |  | 2.68 | 0.55 | 4.87 | **<.001** | 14.53 (4.95 ~ 42.66) |
| Abnormal GB morphology |  |  |  |  |  |  |  |  |  |  |  |
| No |  |  |  |  | 1.00 (Reference) |  |  |  |  |  |  |
| Yes | 2.86 | 0.28 | 10.18 | **<.001** | 17.44 (10.06 ~ 30.25) |  |  |  |  |  |  |
| Micro-GB |  |  |  |  |  |  |  |  |  |  |  |
| No |  |  |  |  | 1.00 (Reference) |  |  |  |  |  |  |
| Yes | 1.95 | 0.24 | 8.11 | **<.001** | 7.01 (4.38 ~ 11.21) |  |  |  |  |  |  |
| Abnormal GEI |  |  |  |  |  |  |  |  |  |  |  |
| No |  |  |  |  | 1.00 (Reference) |  |  |  |  |  | 1.00 (Reference) |
| Yes | 3.69 | 0.30 | 12.20 | **<.001** | 39.88 (22.06 ~ 72.11) |  | 3.74 | 0.59 | 6.35 | **<.001** | 41.92 (13.23 ~ 132.89) |
| Age | 0.00 | 0.01 | 0.71 | 0.479 | 1.00 (0.99 ~ 1.02) |  |  |  |  |  |  |
| Weight | 0.00 | 0.00 | 1.89 | 0.059 | 1.00 (1.00 ~ 1.00) |  | 0.01 | 0.00 | 2.07 | **0.039** | 1.01 (1.01 ~ 1.01) |
| GB length | -1.28 | 0.15 | -8.38 | **<.001** | 0.28 (0.21 ~ 0.37) |  | -0.90 | 0.29 | -3.09 | **0.002** | 0.41 (0.23 ~ 0.72) |
| GB width | -4.63 | 0.59 | -7.87 | **<.001** | 0.01 (0.00 ~ 0.03) |  |  |  |  |  |  |
| GB CSA | -1.43 | 0.18 | -7.96 | **<.001** | 0.24 (0.17 ~ 0.34) |  |  |  |  |  |  |
| L/W preprandial GB | -0.06 | 0.04 | -1.44 | 0.149 | 0.94 (0.86 ~ 1.02) |  |  |  |  |  |  |
| TPN | 0.02 | 0.01 | 2.29 | **0.022** | 1.02 (1.01 ~ 1.05) |  |  |  |  |  |  |
| ALP | 0.00 | 0.00 | 1.31 | 0.191 | 1.00 (1.00 ~ 1.00) |  |  |  |  |  |  |
| AST | 0.00 | 0.00 | 0.49 | 0.624 | 1.00 (1.00 ~ 1.00) |  |  |  |  |  |  |
| ALT | -0.00 | 0.00 | -0.47 | 0.635 | 1.00 (1.00 ~ 1.00) |  |  |  |  |  |  |
| GGT | 0.01 | 0.00 | 7.73 | **<.001** | 1.01 (1.01 ~ 1.01) |  | 0.01 | 0.00 | 4.52 | **<.001** | 1.01 (1.01 ~ 1.01) |
| TBIL | 0.01 | 0.00 | 2.89 | **0.004** | 1.01 (1.01 ~ 1.01) |  |  |  |  |  |  |
| DBIL | 0.01 | 0.00 | 2.13 | **0.033** | 1.01 (1.01 ~ 1.01) |  | -0.01 | 0.01 | -2.69 | **0.007** | 0.99 (0.98 ~ 0.99) |
| IBIL | 0.00 | 0.00 | 1.65 | 0.098 | 1.00 (1.00 ~ 1.01) |  |  |  |  |  |  |
| TBA | 0.01 | 0.00 | 3.24 | **0.001** | 1.01 (1.01 ~ 1.01) |  | 0.02 | 0.01 | 3.29 | **0.001** | 1.02 (1.01 ~ 1.03) |
| WBC | -0.11 | 0.03 | -4.12 | **<.001** | 0.89 (0.85 ~ 0.94) |  | -0.13 | 0.07 | -1.88 | 0.060 | 0.88 (0.77 ~ 1.01) |
| PLT | 0.01 | 0.00 | 2.85 | **0.004** | 1.01 (1.01 ~ 1.01) |  |  |  |  |  |  |
| APRI | -0.12 | 0.07 | -1.79 | 0.073 | 0.89 (0.78 ~ 1.01) |  |  |  |  |  |  |

**Abbreviation:** BA: biliary atresia, B: gallbladder, LSM: liver stiffness measurement, TPN: total protein, ALP: alkaline phosphatase, AST: aspartate aminotransferase, ALT: alanine transaminase, GGT: gamma-glutamyl transpeptidase, TBIL: total bilirubin, DBIL: direct bilirubin, IBIL: indirect bilirubin, TBA: total bile acid, WBC: white blood cells, PLT: platelet, APRI: aspartate aminotransferase-to-platelet ratio index, CSA: cross-sectional area, GEI: gallbladder emptying index, GBLW: GB length to width ratio. OR: Odds Ratio, CI: Confidence Interval.

**Table 3. Diagnostic Efficiency of Six Machine Learning Models Integrating Ultrasonic and Clinical Information in Training, Testing, and Validation Sets**

| **Algorithms** | **Average performance of cross-validation on the training set** | | | | |  | **Performance on the validation set** | | | | |
| --- | --- | --- | --- | --- | --- | --- | --- | --- | --- | --- | --- |
| **Precision** | **Recall** | **F1-score** | **Accuracy** | **AUROC (95%CI)** | **Precision** | **Recall** | **F1-score** | **Accuracy** | **AUROC (95%CI)** |
| LRM | 0.889 | 0.919 | 0.901 | 0.883 | 0.950 (0.930-0.969) | 0.910 | 0.953 | 0.931 | 0.923 | 0.920(0.869-0.970) |
| DET | 0.890 | 0.912 | 0.898 | 0.883 | 0.876 (0.839-0.914) | 0.838 | 0.891 | 0.864 | 0.846 | 0.842(0.771-0.913) |
| MLP | 0.922 | 0.906 | 0.912 | 0.898 | 0.960 (0.939-0.980) | 0.897 | 0.953 | 0.924 | 0.915 | 0.911(0.857-0.964) |
| SVC | 0.937 | 0.874 | 0.902 | 0.890 | 0.948 (0.931-0.965) | 0.918 | 0.875 | 0.896 | 0.889 | 0.890(0.831-0.950) |
| RF | 0.901 | 0.912 | 0.906 | 0.890 | 0.961 (0.940-0.982) | 0.882 | 0.938 | 0.909 | 0.897 | 0.893(0.835-0.952) |
| TL | 0.902 | 0.931 | 0.916 | 0.901 | 0.966 (0.944-0.984) | 0.884 | 0.953 | 0.917 | 0.906 | 0.967(0.935-0.991) |

**Abbreviation:** AUROC: Area under the receiver operating characteristic, CI: Confidence interval, ML: Machine Learning, LRM: Logistic regression model, RF: Random Forest, SVC: Support vector machine classifier, MLP: Multilayer Perceptron, DET: Decision tree, TL: Transfer Learning
